# Supplementary material for: Bringing Together Evolution on Serpentine and Polyploidy: Spatiotemporal History of the Diploid-Tetraploid Complex of Knautia arvensis (Dipsacaceae)
Source: PubMed Central journal article supplement (PMC3390331; doi:10.1371/journal.pone.0039988), 2012-07-05
Supplement: pone.0039988.s001.pdf [file pone.0039988.s001.pdf]

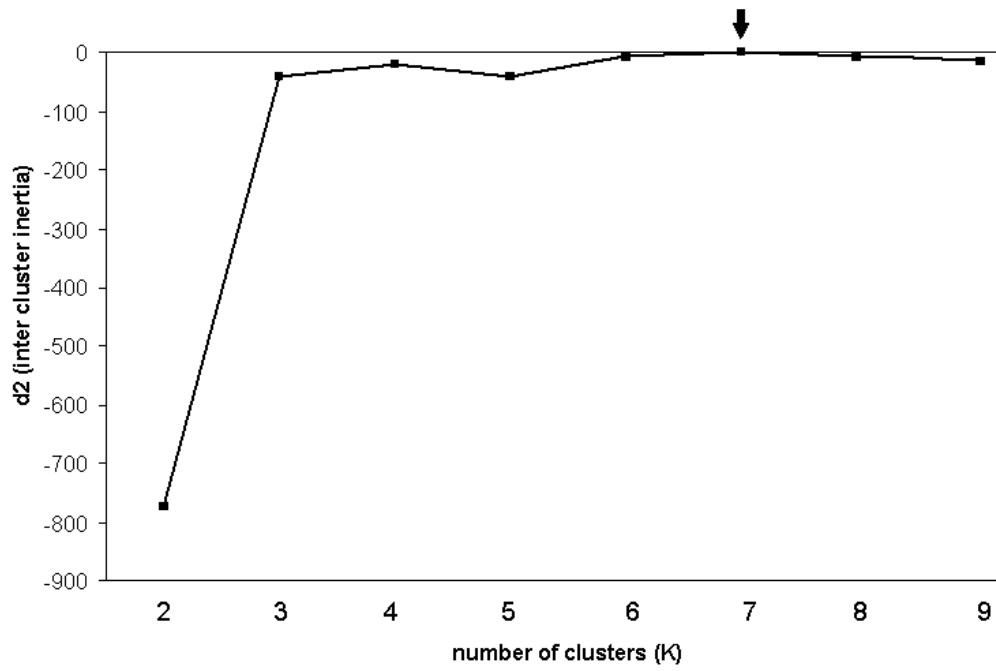

**Fig. S1** Second derivative of the inter cluster inertia of each number of groups (K) as estimated by the nonhierarchical K-means clustering.
