# Supplementary material for: Bringing Together Evolution on Serpentine and Polyploidy: Spatiotemporal History of the Diploid-Tetraploid Complex of Knautia arvensis (Dipsacaceae)
Source: PubMed Central journal article supplement (PMC3390331; doi:10.1371/journal.pone.0039988), 2012-07-05
Supplement: pone.0039988.s002.pdf [file pone.0039988.s002.pdf]

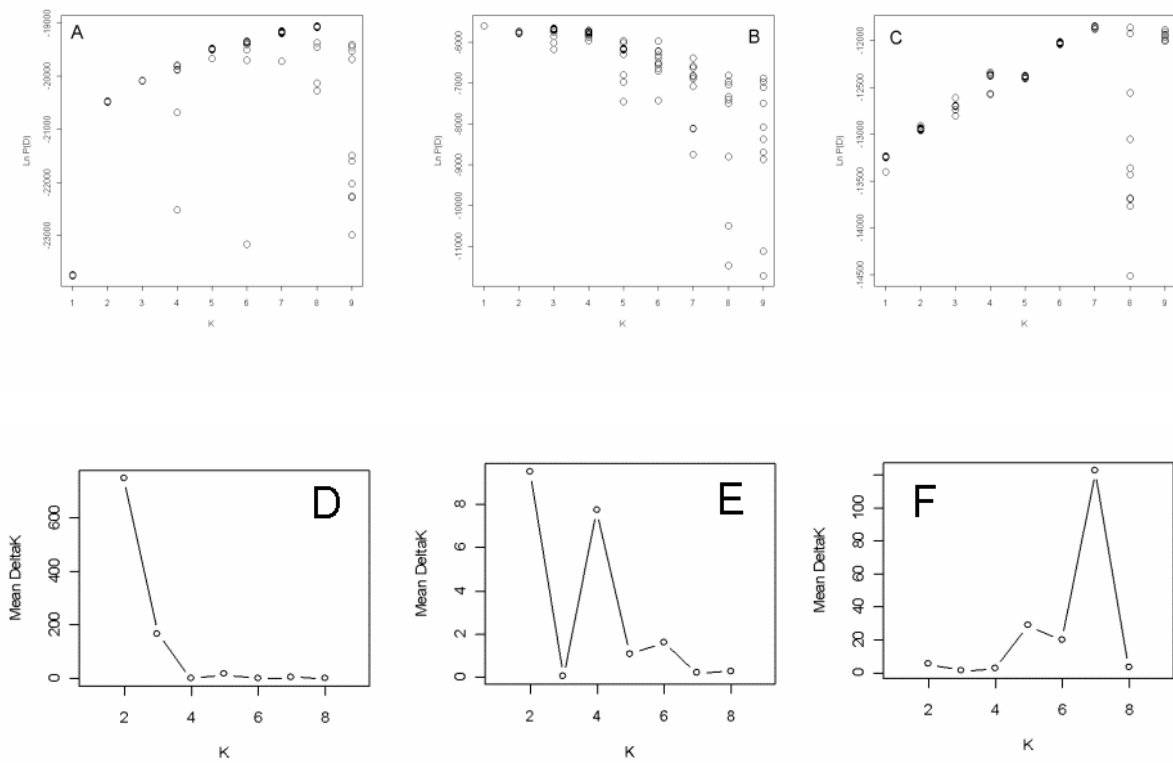

**Fig. S2** Summary of STRUCTURE 2.2 analyses based on AFLP multilocus phenotypes of 360 plants of *Knutia arvensis* agg. Values of Ln probability of the data for each number of groups (K) is plotted against the K-values for the whole dataset (A), and separate analyses of the non-relict diploid subgroup (B), and the relict diploid + tetraploid subgroup (C). Delta K values calculated according to Evanno et al. [55] are presented for the analysis of the whole dataset (D), and separate analyses of the non-relict diploid subgroup (E), and the relict diploid + tetraploid subgroup (F).
