# Supplementary material for: Bringing Together Evolution on Serpentine and Polyploidy: Spatiotemporal History of the Diploid-Tetraploid Complex of Knautia arvensis (Dipsacaceae)
Source: PubMed Central journal article supplement (PMC3390331; doi:10.1371/journal.pone.0039988), 2012-07-05
Supplement: pone.0039988.s004.pdf [file pone.0039988.s004.pdf]

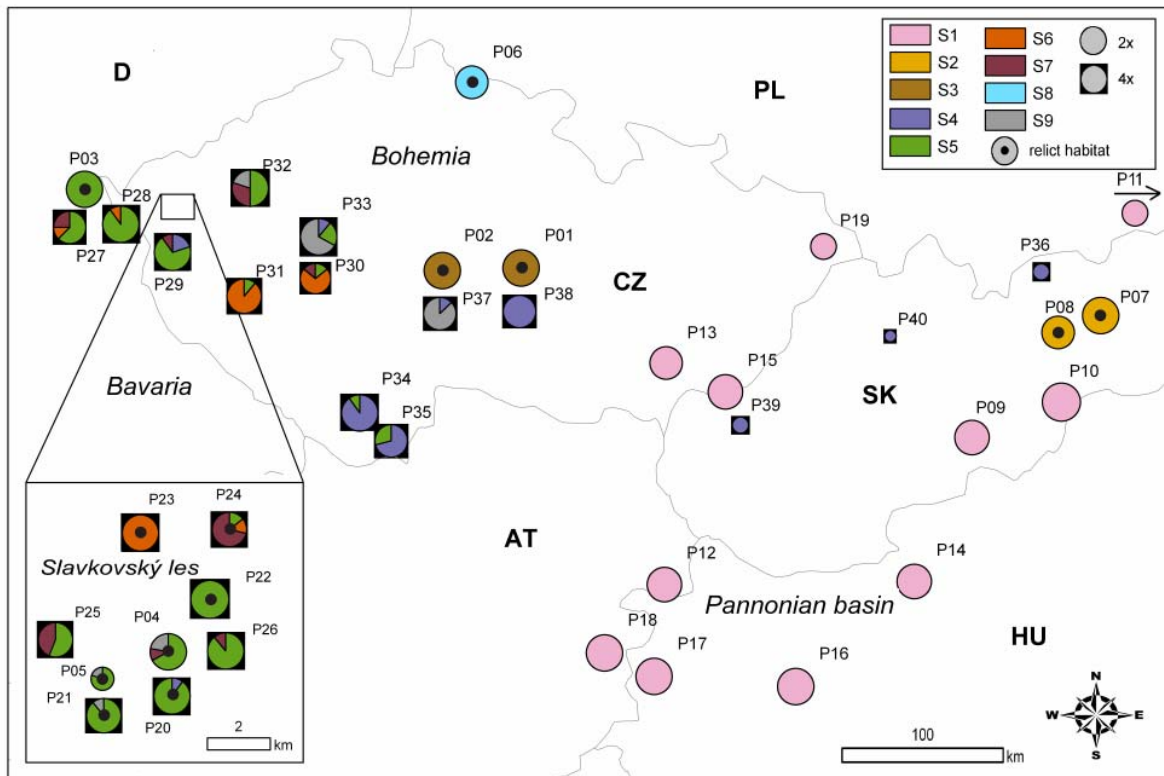

**Fig. S4** Geographical location of 40 analyzed populations of *Knautia arvensis* agg. in central Europe and their phylogeographical grouping according to the STRUCTURE analysis of AFLP phenotypes. Pie charts represent the proportion of individuals belonging to each of the nine detected groups (S1-S9). The size of the pie chart reflects sample size. The inset displays the situation in the Slavkovský les serpentine area.
