# Supplementary material for: Bringing Together Evolution on Serpentine and Polyploidy: Spatiotemporal History of the Diploid-Tetraploid Complex of Knautia arvensis (Dipsacaceae)
Source: PubMed Central journal article supplement (PMC3390331; doi:10.1371/journal.pone.0039988), 2012-07-05
Supplement: pone.0039988.s006.pdf [file pone.0039988.s006.pdf]

**Table S1** Contingency table comparing the pattern in AFLP data (results of the nonhierarchical K-means clustering; clusters K1-K7) and the distribution of chloroplast haplotypes (A-M); numbers of individuals are presented in each field.

|    | A  | B | C | D | E | F | G | H | I | J | K | L | M |
|----|----|---|---|---|---|---|---|---|---|---|---|---|---|
| K1 | 7  |   |   |   |   |   |   |   |   | 1 |   |   | 1 |
| K2 | 1  |   |   |   |   |   |   |   |   |   |   |   |   |
| K3 | 1  |   |   |   |   | 3 |   | 2 |   |   |   |   |   |
| K4 | 6  | 3 | 1 |   |   | 3 |   |   |   |   |   |   |   |
| K5 | 10 | 3 |   | 2 |   |   |   |   |   |   | 2 |   |   |
| K6 | 7  | 1 |   | 1 | 4 | 1 |   | 2 |   |   |   |   |   |
| K7 | 6  | 1 |   | 2 |   | 1 | 1 | 1 | 2 |   |   | 1 |   |
